# Supplementary material
Source: Research Square preprint supplement (doi:10.21203/rs.3.rs-9663504/v1)
Supplement: Supplementary file 1 [file 81b86f15eb7f24931cb01986.docx]

# Supplementary Tables

Table S1. List of endophytic bacteria isolated from surface-sterilized root nodules of agroforestry legumes in southern Ethiopia.

| Isolates | Bacterial Genus  (class) | Maximum. 16S rDNA sequence identity % | Accession No. | Legume host | Geographic origin | Sampling (associated legume) | Land use/ agroforestry system near the target legume host, or soil source in case of trapping isolation method |
| --- | --- | --- | --- | --- | --- | --- | --- |
| Ac111 | *Achromobacter* sp. (β) | 99 | EU266588 | *A. abyssinica* | Durame | Tg (If) | Soil from under *I. arrecta* near Eucalyptus dominated hillside |
| Ac113 | *Achromobacter* sp. (β) | 99 | EU266588 | *A. abyssinica* | Leku | Tg (Mf) | Soil from under *M. ferruginea* tree growing inside cornfield |
| Ag3b | *Achromobacter* sp. (β) | 99 | HM137034 | *A. gummifera* | Durame | DE | Eucalyptus woodlot |
| Mf36b | *Acinetobacter* sp. (γ) | 98 | DQ536511 | *M. ferruginea* | Y/Alem | DE | Coffee garden |
| Ac1g | *Agrobacterium* sp. (α) | 99 | AB102735 | *A. abyssinica* | Durame | DE | Enset, Tef field boundary |
| Ag96 | *Agrobacterium* sp. (α) | 99 | AB102735 | *A. gummifera* | W/Genet | DE | *A. gummifera* woodlot |
| Cw88b | *Agrobacterium* sp. (α) | 99 | AY972446 | *V. unguiculata* | Shone | Tf (Ag) | Sown under *A. gummifera* near eucalyptus woodlot |
| Hb76 | *Agrobacterium* sp. (α) | 99 | AY972446 | *P. vulgaris* | W/Sodo | Tf (Ag) | Sown under *A. gummifera* near Eucalyptus woodlot |
| Hb87a | *Agrobacterium* sp. (α) | 99 | AB377521 | *P. vulgaris* | W/Genet | Tf (Ag) | Sown under *A. gummifera* growing as woodlot |
| Mf30c | *Agrobacterium* sp. (α) | 99 | AY972446 | *M. .ferruginea* | Dilla | DE | Enset-coffee home garden |
| Pp143 | *Agrobacterium* sp. (α) | 100 | EU399926 | *C. cajan* | Leku | Tg (Mf) | Sown under *M. ferruginea* tree growing inside cornfield |
| Ag14a | *Arthrobacter* sp. (δ) | 97 | EU399926 | *A. gummifera* | W/Sodo | DE | Eucalyptus woodlot |
| Ag126 | *Arthrobacter* sp. (δ) | 96 | DQ849078 | *A. gummifera* | Dilla | Tg (Mf) | Soil from under *M. ferruginea* inside enset-coffee garden |
| Ag22b | *Bacillus* sp. (Gm+) | 99 | HQ164548 | *A. gummifera* | Dilla | DE | Coffee garden |
| Gn79a | *Bacillus* sp. (Gm+) | 99 | HM222691 | *A. hypogeae* | Durame | Tf (Mf) | Sown under *M. ferruginea* inside enset-coffee garden |
| Pp46a | *Bacillus* sp. (Gm+) | 99 | FJ755919 | *C. cajan* | Dilla | Tf (Mf) | Sown under *M. ferruginea* inside enset-coffee garden |
| Pp54a | *Bacillus* sp. (Gm+) | 98 | AY461699 | *C. cajan* | W/Genet | Tf (Mf) | Sown under *A. gummifera* growing as woodlot |
| Pp56a | *Bacillus* sp. (Gm+) | 99 | FJ784127 | *C. cajan* | Leku | Tf (Mf) | Sown under *M. ferruginea* tree growing inside cornfield |
| Pp57a | *Bacillus* sp. (Gm+) | 99 | FJ561295 | *C. cajan* | Y/Alem | Tf (Mf) | Sown under *M. ferruginea* tree growing inside coffee garden |
| Cp64a | *Bacillus* sp. (Gm+) | 99 | AB066339 | *C. arietinum* | Durame | Tf (Mf) | Sown under *M. ferruginea* inside enset-coffee garden |
| Cp78a | *Bacillus* sp. (Gm+) | 99 | HM584906 | *C. arietinum* | W/Sodo | Tf (Ag) | Sown under *A. gummifera* near eucalyptus woodlot |
| Sb83a | *Bacillus* sp. (Gm+) | 99 | HM584906 | *G. max* | A/Negele | Tf (Ag) | Sown under *A. gummifera* growing inside wheat field |
| Sb131 | *Bacillus* sp. (Gm+) | 99 | DQ207559 | *G. max* | Leku | Tg (Mf) | Soil from under *M. ferruginea* tree growing inside cornfield |
| If115 | *Bacillus* sp. (Gm+) | 100 | EU855197 | *I. arrecta* | Dilla | Tg (Mf) | Soil from under *M. ferruginea* inside enset-coffee garden |
| If116 | *Bacillus* sp. (Gm+) | 99 | EU855197 | *I. arrecta* | Bule | Tg (Mf) | Soil from under *M. ferruginea* inside faba bean field |
| If124 | *Bacillus* sp. (Gm+) | 99 | HQ164548 | *I. arrecta* | Durame | Tg (Mf) | Soil from under *M. ferruginea* inside enset-coffee garden |
| Hb52a | *Bacillus* sp. (Gm+) | 99 | FJ755919 | *P. vulgaris* | Leku | Tf (Mf) | Sown under *M. ferruginea* inside coffee garden |
| Hb58a | *Bacillus* sp. (Gm+) | 99 | AB066339 | *P. vulgaris* | Dilla | Tf (Mf) | Sown under *M. ferruginea* inside enset-coffee garden |
| Hb82a | *Bacillus* sp. (Gm+) | 98 | GU252111 | *P. vulgaris* | W/Sodo | Tf (Ag) | Sown under *A. gummifera* near eucalyptus woodlot |
| Hb84 | *Bacillus* sp. (Gm+) | 98 | GU339273 | *P. vulgaris* | A/Negele | Tf (Ag) | Sown under *A. gummifera* growing inside wheat field |
| Mb50a | *Bacillus* sp. (Gm+) | 99 | FM164631 | *V. radiate* | Dilla | Tf (Mf) | Sown under *M. ferruginea* inside enset-coffee garden |
| Mb70a | *Bacillus* sp. (Gm+) | 98 | AB118223 | *V. radiate* | W/Sodo | Tf (Ag) | Sown under *A. gummifera* near eucalyptus woodlot |
| Cw51a | *Bacillus* sp. (Gm+) | 98 | AB330406 | *V. unguiculata* | Y/Alem | Tf (Mf) | Sown under *M. ferruginea* inside enset-coffee garden |
| Cw59a | *Bacillus* sp. (Gm+) | 99 | GU368375 | *V. unguiculata* | Dilla | Tf (Mf) | Sown under *M. ferruginea* inside enset-coffee garden |
| Cw60a | *Bacillus* sp. (Gm+) | 99 | AB066339 | *V. unguiculata* | Dilla | Tf (Mf) | Sown under *M. ferruginea* inside enset-coffee garden |
| Cw66a | *Bacillus* sp. (Gm+) | 99 | GU368375 | *V. unguiculata* | Durame | Tf(Mf) | Sown under *M. ferruginea* inside enset-coffee garden |
| Cw71a | *Bacillus* sp. (Gm+) | 99 | EF114313 | *V. unguiculata* | A/Negele | Tf(Ag) | Sown under *A. gummifera* growing inside wheat field |
| Pp127 | *Bradyrhizobium* sp.(α) | 99 | HQ171486 | *C. cajan* | Dilla | Tg(Mf) | Soil from under *M. ferruginea* inside enset-coffee garden |
| Pp141 | *Bradyrhizobium* sp.(α) | 99 | HQ171486 | *C. cajan* | Leku | Tg (Mf) | Soil from under *M. ferruginea* tree growing inside cornfield |
| If106 | *Bradyrhizobium* sp.(α) | 100 | HQ171486 | *I. arrecta* | Durame | DE | Eucalyptus woodlot |
| Ac1a | *Enterobacter* sp. (γ) | 98 | AB308444 | *A. abyssinica* | Durame | DE | Enset, Tef field boundary |
| Ac114 | *Enterobacter* sp. (γ) | 95 | FM164633 | *A. abyssinica* | Bule | T (Mf) | Soil from under *M. ferruginea* inside faba bean field |
| Ac120 | *Enterobacter* sp. (γ) | 96 | FM164633 | *A. abyssinica* | W/Sodo | T (Ag) | Soil from under *A. gummifera* near eucalyptus woodlot |
| Ag3c | *Enterobacter* sp. (γ) | 98 | AY310732 | *A. gummifera* | Durame | DE | Eucalyptus woodlot |
| Ag4c | *Enterobacter* sp. (γ) | 98 | AY310732 | *A. gummifera* | Shone | DE | Eucalyptus woodlot |
| Ag5a | *Enterobacter* sp. (γ) | 97 | FM164633 | *A. gummifera* | W/Sodo | DE | Grassland |
| Ag5b | *Enterobacter* sp. (γ) | 97 | AB675636 | *A. gummifera* | W/Sodo | DE | Grassland |
| Ag6a | *Enterobacter* sp. (γ) | 96 | GQ478258 | *A. gummifera* | Shone | DE | Eucalyptus woodlot |
| Ag9a | *Enterobacter* sp. (γ) | 94 | FM164633 | *A. gummifera* | W/Sodo | DE | Eucalyptus woodlot |
| Ag10b | *Enterobacter* sp. (γ) | 99 | HM585374 | *A. gummifera* | W/Sodo | DE | Grassland |
| Ag13a | *Enterobacter* sp. (γ) | 94 | FM164633 | *A. gummifera* | Shone | DE | Eucalyptus woodlot |
| Ag27a | *Enterobacter* sp. (γ) | 98 | EU304248 | *A. gummifera* | W/Genet | DE | Albizia gummifera woodlot |
| Ag33b | *Enterobacter* sp. (γ) | 97 | FJ190535 | *A. gummifera* | Leku | DE | Eucalyptus woodlot |
| Ag45a | *Enterobacter* sp. (γ) | 94 | EU331414 | *A. gummifera* | W/Genet | DE | Albizia gummifera woodlot |
| Ag45b | *Enterobacter* sp. (γ) | 95 | FM164633 | *A. gummifera* | W/Genet | DE | Albizia gummifera woodlot |
| GN62a | *Enterobacter* sp. (γ) | 97 | EU331414 | *A. hypogeae* | W/Sodo | Tf (Ag) | Sown under *A. gummifera* near eucalyptus woodlot |
| GN69a | *Enterobacter* sp. (γ) | 97 | EU331414 | *A. hypogeae* | Shone | T f(Ag) | Sown under *A. gummifera* near eucalyptus woodlot |
| If103 | *Enterobacter* sp. (γ) | 99 | HM585374 | *I. arrecta* | Durame | DE | Eucalyptus woodlot |
| If105 | *Enterobacter* sp.(γ) | 98 | HM585374 | *I. arrecta* | Durame | DE | Eucalyptus woodlot |
| If107 | *Enterobacter* sp.(γ) | 95 | AY310732 | *I. arrecta* | Durame | DE | Eucalyptus woodlot |
| If118 | *Enterobacter* sp.(γ) | 96 | FM164633 | *I. arrecta* | Leku | Tg (Mf) | Soil from under *M. ferruginea* tree growing inside cornfield |
| If119 | *Enterobacter* sp.(γ) | 98 | AB675636 | *I. arrecta* | Dilla | Tg (Mf) | Soil from under *M. ferruginea* inside enset-coffee garden |
| IF129 | *Enterobacter* sp.(γ) | 97 | EU331414 | *I. arrecta* | Durame | Tg (Mf) | Soil from under *M. ferruginea* inside enset-coffee garden |
| Mf2a | *Enterobacter* sp.(γ) | 96 | AB308444 | *M. .ferruginea* | Durame | DE | Enset-coffee home garden |
| Mf2b | *Enterobacter* sp.(γ) | 97 | AB435591 | *M. ferruginea* | Durame | DE | Enset-coffee home garden |
| Mf29a | *Enterobacter* sp.(γ) | 94 | GQ451698 | *M. ferruginea* | Dilla | DE | Enset-coffee home garden |
| Mf29b | *Enterobacter* sp.(γ) | 95 | AB308444 | *M. ferruginea* | Dilla | DE | Enset-coffee home garden |
| Mf30b | *Enterobacter* sp.(γ) | 97 | AY310732 | *M. ferruginea* | Dilla | DE | Enset-coffee home garden |
| Mf32a | *Enterobacter* sp.(γ) | 98 | CP000653 | *M. ferruginea* | Dilla | DE | Enset-coffee home garden |
| Mf36a | *Enterobacter* sp.(γ) | 96 | FJ463411 | *M. ferruginea* | Y/Alem | DE | Coffee garden |
| Mf37a | *Enterobacter* sp.(γ) | 95 | FM164633 | *M. ferruginea* | Dilla | DE | Coffee garden |
| Mf38a | *Enterobacter* sp.(γ) | 98 | AY310732 | *M. ferruginea* | Leku | DE | Coffee garden |
| Mf38b | *Enterobacter* sp.(γ) | 99 | AY310732 | *M. ferruginea* | Leku | DE | Coffee garden |
| Mf39 | *Enterobacter* sp.(γ) | 95 | EU304248 | *M. ferruginea* | Leku | DE | Corn field |
| Mf44 | *Enterobacter* sp.(γ) | 97 | EU304248 | *M. ferruginea* | Y/Alem | DE | Coffee garden |
| Mf121 | *Enterobacter* sp.(γ) | 98 | FM164633 | *M. ferruginea* | Durame | Tg (Ac) | Soil from *A. abyssinica* near eucalyptus woodlot |
| Hb63a | *Enterobacter* sp.(γ) | 98 | AB435591 | *P. vulgaris* | Durame | Tf (Mf) | Sown under *M. ferruginea* inside enset-coffee garden |
| Hb63b | *Enterobacter* sp.(γ) | 98 | AB435591 | *P. vulgaris* | Durame | Tf (Mf) | Sown under *M. ferruginea* inside enset-coffee garden |
| Mb85a | *Enterobacter* sp.(γ) | 96 | EU855208 | *V. radiate* | Shone | Tf (Ag) | Sown under A. gummifera near eucalyptus woodlot |
| Cw53a | *Enterobacter* sp.(γ) | 97 | AB308444 | *V. unguiculata* | Dilla | Tf (Mf) | Sown under *M. ferruginea* inside enset-coffee garden |
| Cw92a | *Enterobacter* sp.(γ) | 97 | EU221358 | *V. unguiculata* | Durame | Tf(Mf) | Sown under *M. ferruginea* inside enset-coffee garden |
| Cw95a | *Enterobacter* sp.(γ) | 95 | EF175731 | *V. unguiculata* | Shone | Tf(Ag) | Sown under *A. gummifera* near eucalyptus woodlot |
| Ac1b | *Klebsiella* sp. (γ) | 99 | DQ122370 | *A. abyssinica* | Durame | DE | Enset, Teff field boundary |
| Mf24a | *Klebsiella* sp. (γ) | 98 | GQ259887 | *M. .ferruginea* | Dilla | DE | Enset-coffee home garden |
| Hb48a | *Klebsiella* sp. (γ) | 97 | DQ122370 | *P. vulgaris* | W/Genet | Tf(Ag) | Sown under *A. gummifera* growing as woodlot |
| Cw61a | *Klebsiella* sp. (γ) | 98 | EU078621 | *V. unguiculata* | W/Sodo | Tf(Ag) | Sown under *A. gummifera* near eucalyptus woodlot |
| Ac112 | *Labrys* sp. (α) | 99 | FJ707292 | *A. abyssinica* | Durame | Tg(Mf) | Soil from under *M. ferruginea* inside enset-coffee garden |
| Mf34 | *Leclericia* sp.(γ) | 99 | HQ242723 | *M. .ferruginea* | Dilla | DE | Coffee garden |
| Mf21b | *Leifsonia* sp.(δ) | 99 | AB495172 | *M. ferruginea* | Wonago | DE | Enset-coffee |
| Cp125 | *Methylobacterium* sp.(α) | 88 | GU368371 | *C. arietenum* | Durame | Tg (Ag) | Soil from under *A. gummifera* near eucalyptus woodlot |
| Mb137 | *Methylobacterium* sp.(α) | 92 | GU186121 | *V. radiate* | Bule | Tg(Mf) | Soil from under *M. ferruginea* inside faba bean field |
| Ac110 | *Microbacterium* sp. (δ) | 99 | FN550141 | *A. abyssinica* | Shone | Tg(Ag) | Soil from under *A. gummifera* near eucalyptus woodlot |
| If137 | *Microbacterium* sp. (δ) | 99 | AJ717361 | *I. arrecta* | A/Negele | Tg(Ag) | Soil from under *A. gummifera* inside wheat field |
| Cp133 | *Micrococcus*sp.(δ) | 99 | EU704697 | *C. arietinum* | Shone | Tg(Ag) | Soil from under *A. gummifera* near eucalyptus woodlot |
| Mb136 | *Paenibacillus* sp. (Gm+) | 97 | AB186915 | *V. radiate* | Wonago | Tg(Mf) | Soil from under *M. ferruginea* inside enset-coffee garden |
| Ac104 | *Pantoea* sp. (γ) | 99 | AM421978 | *A. abyssinica* | Durame | DE | Eucalyptus woodlot |
| If12d | *Pantoea* sp. (γ) | 98 | GU186121 | *I. arrecta* | Durame | DE | Eucalyptus woodlot |
| Mf21a | *Pantoea* sp. (γ) | 98 | GU186121 | *M. ferruginea* | Wonago | DE | Enset-coffee home garden |
| Mf30a | *Pantoea* sp. (γ) | 96 | GU204957 | *M. .ferruginea* | Dilla | DE | Enset-coffee home garden |
| Mf31a | *Pantoea* sp. (γ) | 97 | CP002206 | *M. .ferruginea* | Dilla | DE | Enset-coffee home garden |
| Mf40b | *Pantoea* sp. (γ) | 94 | DQ122372 | *M. .ferruginea* | Wonago | DE | Enset-coffee home garden |
| Mf89 | *Pantoea* sp. (γ) | 98 | GU186121 | *M. .ferruginea* | Dilla | DE | Coffee garden |
| Mb102a | *Pantoea* sp. (γ) | 98 | GU186121 | *V. radiate* | Durame | Tf (Mf) | Sown under *M. ferruginea* inside enset-coffee garden |
| Ac117 | *Pseudomonas* sp. (γ) | 98 | GU726581 | *A. abyssinica* | Dilla | T g(Mf) | Soil from under M. ferruginea inside enset-coffee garden |
| Ag3a | *Pseudomonas* sp. (γ) | 99 | GU358073 | *A. gummifera* | Durame | DE | Eucalyptus woodlot |
| Ag27b | *Pseudomonas* sp. (γ) | 99 | FJ527671 | *A. gummifera* | W/Genet | DE | Albizia gummifera woodlot |
| Ag33a | *Pseudomonas* sp. (γ) | 98 | HM045838 | *A. gummifera* | Leku | DE | Eucalyptus woodlot |
| If134 | *Pseudomonas* sp. (γ) | 99 | AY569299 | *I. arrecta* | Y/Alem | Tg (Mf) | Soil from under M. ferruginea inside enset-coffee garden |
| Mf15b | *Pseudomonas* sp. (γ) | 100 | GU358073 | *M. ferruginea* | Durame | DE | Enset-coffee home garden |
| Mf40a | *Pseudomonas* sp. (γ) | 97 | EU934229 | *M. ferruginea* | Wonago | DE | Enset-coffee home garden |
| Mf43c | *Pseudomonas* sp. (γ) | 100 | GU475123 | *M. ferruginea* | Bule | DE | Enset garden |
| Hb49a | *Pseudomonas* sp. (γ) | 99 | GU367870 | *P. vulgaris* | Y/Alem | Tf(Mf) | Sown under *M. ferruginea* tree inside enset-coffee home garden |
| Ac139 | *Rhizobium* sp.(α) | 99 | FJ595998 | *A. abyssinica* | A/Negele | Tg (Ag) | Soil from under *A. gummifera* growing inside wheat field |
| Ag4a | *Rhizobium* sp.(α) | 100 | EU074181 | *A. gummifera* | Shone | DE | Eucalyptus woodlot |
| Ag6b | *Rhizobium* sp.(α) | 99 | EU074181 | *A. gummifera* | Shone | DE | Eucalyptus woodlot |
| Ag7a | *Rhizobium* sp.(α) | 99 | EF149005 | *A. gummifera* | W/Sodo | DE | Eucalyptus woodlot |
| Ag8a | *Rhizobium* sp.(α) | 99 | EU074181 | *A. gummifera* | A/Negele | DE | Wheat field |
| Ag10a | *Rhizobium* sp.(α) | 100 | EU074181 | *A. gummifera* | W/Sodo | DE | Grassland |
| Ag11a | *Rhizobium* sp.(α) | 99 | HM582866 | *A. gummifera* | W/Sodo | DE | Grassland |
| Ag14b | *Rhizobium* sp.(α) | 99 | EU074181 | *A. gummifera* | W/Sodo | DE | Eucalyptus woodlot |
| Ag17b | *Rhizobium* sp.(α) | 99 | EU074181 | *A. gummifera* | Durame | DE | Eucalyptus woodlot |
| Ag19b | *Rhizobium* sp.(α) | 100 | EU074181 | *A. gummifera* | Shone | DE | Eucalyptus woodlot |
| Ag20b | *Rhizobium* sp.(α) | 99 | EU074181 | *A. gummifera* | W/Sodo | DE | Eucalyptus woodlot |
| Ag22a | *Rhizobium* sp.(α) | 99 | EU074181 | *A. gummifera* | Dilla | DE | Coffee garden |
| Ag28a | *Rhizobium* sp.(α) | 99 | EU074181 | *A. gummifera* | Dilla | DE | Coffee garden |
| If16a | *Rhizobium* sp.(α) | 98 | HM852118 | *I. arrecta* | Durame | DE | Eucalyptus woodlot |
| Mf23b | *Rhizobium* sp.(α) | 100 | EU074181 | *M. .ferruginea* | Durame | Tf(Ag) | Eucalyptus woodlot |
| Mf25a | *Rhizobium* sp.(α) | 99 | EU074181 | *M. ferruginea* | Y/Alem | DE | Enset-coffee home garden |
| Mf26a | *Rhizobium* sp.(α) | 99 | EU074181 | *M. ferruginea* | Bule | DE | Bean field |
| Mf30g | *Rhizobium* sp.(α) | 99 | EF149005 | *M. ferruginea* | Dilla | DE | Enset-coffee home garden |
| Hb100a | *Rhizobium* sp.(α) | 99 | EU637927 | *P. vulgaris* | Shone | DE | Sown under *A. gummifera* near eucalyptus woodlot |
| Cw55a | *Rhizobium* sp.(α) | 100 | EU074181 | *V. unguiculata* | W/Genet | Tf (Ag) | Sown under *A. gummifera* growing as woodlot |
| Mf41 | *Serattia* sp.(γ) | 96 | AF511524 | *M .ferruginea* | Dilla | DE | Enset-coffee home garden |
| Mf43a | *Serattia* sp.(γ) | 98 | CP000826 | *M .ferruginea* | Bule | DE | Enset garden |
| If132 | *Sphingomonas* sp.(γ) | 99 | AB334774 | *I. arrecta* | W/Sodo | Tg (Ag) | Soil from under A. gummifera near eucalyptus woodlot |

**Notes to Table :** The designations α, β and γ refers to *Proteobacterial* class; δ designates *Actinobacteridae* and Gm+ stands for Gram positive *Firmicutes*.Nodules were obtained by direct excavation (DE), trapping from field under tree canopy (Tf), and by trapping from soil samples in glasshouse culture (Tg). Associated woody legumes are the field standing woody legumes under which trap grain legumes were cultivated or from which rhizosphere soil samples were collected. (Ac*= Acacia abyssinica,* Ag*= Albizia gummifera,* If*=Indigofera arrecta,* Mf*=Millettia ferruginea,* Cp*=Chickpea or Cicer arietinum,* Cw*=* cowpea or *Vigna unguiculata,* Hb*=* haricot bean or *Phaseolus vulgaris,* Mb*=* mung bean or *Vigna radiata,* Pp *=* pigeon pea or *Cajanus cajan,* Sb*=* soybean or *Glycine max,* Gn*=* ground nut or *Arachis hypogeae,* Nd= not done, Ua-Uf = unclustered.

Table S2 The number of bacterial isolates related to rhizobial genera and other endophytic bacteria and their distribution by the type of land use at the sight of their geographic origins in southern Ethiopia.

| Geographic origin | Land use near the target legumes host or soil source | Isolates related to rhizobial genera | | | Other endophytic bacterial isolates | Total N. of isolates per location or land use |
| --- | --- | --- | --- | --- | --- | --- |
| Bradyrhizobium | Methylobacterium | Rhizobium |
| Arsi Negele | Wheat field | 0 | 0 | 2 | 4 | 6 |
| Bule | Faba bean | 0 | 1 | 1 | 2 | 4 |
| Enset | 0 | 0 | 0 | 2 | 2 |
| Subtotal | 0 | 1 | 1 | 4 | 6 |
| Durame | Eucalyptus woodlot | 1 | 1 | 3 | 10 | 15 |
| Enset-tef | 0 | 0 | 0 | 3 | 3 |
| Enset-coffee | 0 | 0 | 0 | 13 | 13 |
| Subtotal | 1 | 1 | 3 | 26 | 31 |
| Dilla | Enset-coffee | 1 | 0 | 1 | 19 | 21 |
| Coffee | 0 | 0 | 2 | 4 | 6 |
| Subtotal | 1 | 0 | 3 | 23 | 27 |
| Leku | Corn field | 1 | 0 | 0 | 6 | 7 |
| Coffee | 0 | 0 | 0 | 3 | 3 |
| Eucalyptus woodlot | 0 | 0 | 0 | 2 | 2 |
| Subtotal | 1 | 0 | 0 | 11 | 12 |
| Shone | Eucalyptus woodlot | 0 | 0 | 4 | 9 | 13 |
| Wolyta Sodo | Eucalyptus woodlot | 0 | 0 | 3 | 10 | 13 |
| Grassland | 0 | 0 | 2 | 3 | 5 |
| Subtotal | 0 | 0 | 5 | 13 | 18 |
| Wonago | Enset-coffee | 0 | 0 | 0 | 5 | 5 |
| Wondo Genet | A. gummifera | 0 | 0 | 1 | 8 | 9 |
| Yirga Alem | Enset-coffee | 0 | 0 | 1 | 3 | 4 |
| Coffee | 0 | 0 | 0 | 4 | 4 |
| Subtotal | 0 | 0 | 1 | 7 | 8 |
| Total per taxonomic group |  | 3 | 2 | 20 | 110 | 135 |

Table S3The distribution of isolates of by bacterial genera, legume host and the type of land use at their geographic origins in southern Ethiopia

| Legume host | Land use near the target legumes host or soil source | Isolates related to rhizobial genera | | | Other endophytic bacterial isolates | Total N. of isolates per location or land use |
| --- | --- | --- | --- | --- | --- | --- |
| Brady  rhizobium | Methylo  bacterium | Rhizobium |
| *A. abyssinica* | Corn field | 0 | 0 | 0 | 1 | 1 |
| Bean field | 0 | 0 | 0 | 1 | 1 |
| Enset-tef | 0 | 0 | 0 | 3 | 3 |
| Eucalyptus | 0 | 0 | 0 | 4 | 4 |
| Enset-coffee | 0 | 0 | 0 | 2 | 2 |
| Wheat field | 0 | 0 | 1 | 0 | 1 |
| Sub total | 0 | 0 | 1 | 11 | 12 |
| *A. gummifera* | Enset-coffee | 0 | 0 | 0 | 1 | 1 |
| A. gummifera | 0 | 0 | 0 | 5 | 5 |
| Wheat field | 0 | 0 | 1 | 0 | 1 |
| Grassland | 0 | 0 | 2 | 3 | 5 |
| Eucalyptus | 0 | 0 | 7 | 10 | 17 |
| Coffee | 0 | 0 | 2 | 1 | 3 |
| Sub total | 0 | 0 | 12 | 20 | 32 |
| *I arrecta* | Bean field | 0 | 0 | 0 | 1 | 1 |
| Corn field | 0 | 0 | 0 | 1 | 1 |
| Wheat field | 0 | 0 | 0 | 1 | 1 |
| Enset-coffee | 0 | 0 | 0 | 5 | 5 |
| Eucalyptus | 1 | 0 | 1 | 5 | 7 |
| Sub total | 1 | 0 | 1 | 13 | 15 |
| *M. ferruginea* | Corn field | 0 | 0 | 0 | 1 | 1 |
| Coffee | 0 | 0 | 0 | 8 | 8 |
| Eucalyptus | 0 | 0 | 1 | 1 | 2 |
| Enset-coffee | 0 | 0 | 2 | 16 | 18 |
| Bean field | 0 | 0 | 1 | 0 | 1 |
| Enset | 0 | 0 | 0 | 2 | 2 |
| Sub total | 0 | 0 | 4 | 28 | 32 |
| *P. vulgaris* | Coffee | 0 | 0 | 0 | 1 | 1 |
| Wheat field | 0 | 0 | 0 | 1 | 1 |
| Enset-coffee | 0 | 0 | 0 | 4 | 4 |
| A. gummifera | 0 | 0 | 0 | 2 | 2 |
| Eucalyptus | 0 | 0 | 1 | 2 | 3 |
| Sub total | 0 | 0 | 1 | 10 | 11 |
| *V. unguiculata* | Wheat field | 0 | 0 | 0 | 1 | 1 |
| Enset-coffee | 0 | 0 | 0 | 6 | 6 |
| Eucalyptus | 0 | 0 | 0 | 3 | 3 |
| A. gummifera | 0 | 0 | 1 | 0 | 1 |
| Sub total | 0 | 0 | 1 | 10 | 11 |
| Others grain legumes | A. gummifera | 0 | 0 | 0 | 1 | 1 |
| Bean field | 0 | 1 | 0 | 0 | 1 |
| Coffee garden | 0 | 0 | 0 | 1 | 1 |
| Corn field | 1 | 0 | 0 | 3 | 4 |
| Enset-coffee | 1 | 0 | 0 | 6 | 7 |
| Eucalyptus | 0 | 1 | 0 | 6 | 7 |
| Wheat field | 0 | 0 | 0 | 1 | 1 |
| Sub total | 2 | 2 | 0 | 18 | 22 |
